# Supplementary material
Source: publisher site journal article supplement (https://www.dovepress.com/article/481106)
Supplement: Supplementary file 1 [file get_supplementary_file.php]

**Supplementary Table 1** Neuropsychological test results of control subjects at baseline and 1 week after surgery

|  | Baseline (n=114) | 1 week later (n=114) | △X a | SD(△X) | Z score |
| --- | --- | --- | --- | --- | --- |
| Verbal fluency test | 20.0±5.4 | 20.5±5.8 | 0.48 | 5.26 | -0.5 (0.1, 0.5) |
| Digit span (forward) | 7.3±2.1 | 7.6±2.3 | 0.36 | 0.4 | -0.4 (-0.4, 0.8) |
| Digit span (backward) | 3.6±0.9 | 3.8±1.0 | 0.14 | 0.62 | -0.2 (-0.2, -0.2) |
| Color trais test(Part 1, time) | 72.2±34.5 | 65.0±32.0 | 5.47 | 16.98 | -0.4 (-0.1, 0.2) |
| Color trais test(Part 1, number of errors) | 0.2±0.6 | 0.2±0.5 | 0.10 | 0.43 | -0.2 (-0.2, -0.2) |
| Color trais test(Part 2, time) | 133.6±51.8 | 122.4±49.6 | 10.59 | 25.21 | -0.5 (-0.3, 0.7) |
| Color trais test(Part 2, number of errors) | 0.2±0.6 | 0.3±0.6 | -0.08 | 0.67 | 0.1 (0.1, 0.1) |
| Stroop tolor and word test(Part 1, time) | 20.4±5.2 | 19.0±4.8 | 1.47 | 3.4 | -0.7 (-0.1, 0.5) |
| Stroop color and word test(Part 1, number of errors) | 0.2±0.5 | 0.1±0.3 | 0.08 | 0.52 | -0.2 (-0.2, -0.2) |
| Stroop color and word test(Part 2, time) | 23.8±7.7 | 21.8±6.2 | 1.96 | 4.52 | -0.7 (-0.2, 0.2) |
| Stroop color and word test(Part 2, number of errors) | 0.1±0.4 | 0.1±0.3 | 0.02 | 0.41 | -0.1 (-0.1, -0.1) |
| Stroop color and word test(Part 3, time) | 34.4±12.4 | 32.5±9.8 | 1.92 | 8.15 | -0.6 (-0.1, 0.3) |
| Stroop color and word test(Part 3, number of errors) | 1.4±2.2 | 0.9±1.4 | 0.51 | 1.84 | -0.3 (-0.3, -0.3) |

**Note:** Data are presented as mean ± SD or median (interquartile range).

△X=the average practice effects; SD(△X)=standard deviation of the average practice effects.

a Test results were adjusted so that a negative Z score indicated deterioration from the baseline test.

**Supplementary Table 2** Neuropsychological test results of patients at baseline and 7 days after surgery

|  | Baseline | | 1 week later | | Z score | |
| --- | --- | --- | --- | --- | --- | --- |
| Non-POCD (n=602) | POCD (n=362) | Non-POCD (n=602) | POCD (n=362) | Non-POCD (n=602) | POCD (n=362) |
| Verbal fluency test | 14.3±5.0 | 14.1±5.1 | 14.3±5.3 | 13.1±4.9 | -0.5 (-0.1, 0.3) | -0.7 (-0.1, 0.1) |
| Digit span (forward) | 6.4±1.8 | 5.9±1.8 | 6.5±1.8 | 5.5±1.8 | -0.4 (-0.4, -0.4) | -1.6 (-0.4, -0.4) |
| Digit span (backward) | 3.6±1.0 | 3.5±1.0 | 3.5±1.0 | 3.4±1.0 | -0.2 (-0.2, -0.2) | -1.8 (-0.2, -0.2) |
| Color trais test(Part 1, time) | 106.1±53.4 | 123.7±56.6 | 106.2±52.9 | 140.2±61.1 | -0.9 (-0.5, 0.1) | -2.4 (-1.0, 0.5) |
| Color trais test(Part 1, number of errors) | 0.6±1.0 | 0.6±0.8 | 0.4±0.9 | 1.4±1.4 | -0.2 (-0.2, 2.1) | -4.9 (-2.6, -0.2) |
| Color trais test(Part 2, time) | 165.5±69.3 | 166.4±68.0 | 164.0±67.9 | 194.2±96.2 | -1.0 (-0.5, 0.2) | -2.4 (-1.2, -0.2) |
| Color trais test(Part 2, number of errors) | 0.8±1.3 | 1.0±1.1 | 0.7±1.3 | 1.3±1.3 | 0.1 (0.1, 0.1) | -1.4 (0.1, 0.1) |
| Stroop tolor and word test(Part 1, time) | 23.9±9.5 | 23.0±10.0 | 23.3±7.9 | 25.1±9.8 | -1.0 (-0.4, 0.5) | -2.2 (-1.0, -0.1) |
| Stroop color and word test(Part 1, number of errors) | 0.6±1.1 | 0.5±1.1 | 0.4±1.0 | 0.9±1.5 | -0.2 (-0.2, -0.2) | -2.1 (-0.2, -0.2) |
| Stroop color and word test(Part 2, time) | 27.7±11.5 | 27.3±14.1 | 25.8±9.0 | 35.3±16.6 | -0.9 (-0.2, 0.7) | -1.8 (-0.7, 0.0) |
| Stroop color and word test(Part 2, number of errors) | 0.7±1.3 | 0.8±1.4 | 0.3±1.0 | 2.4±2.7 | -0.1 (-0.1, 2.4) | -2.5 (-0.1, -0.1) |
| Stroop color and word test(Part 3, time) | 35.9±15.9 | 33.4±15.9 | 35.2±13.9 | 13.1±4.9 | -0.8 (-0.4, 0.4) | -1.3 (-0.4, 0.4) |
| Stroop color and word test(Part 3, number of errors) | 2.0±2.3 | 2.1±2.3 | 1.7±2.1 | 5.5±1.8 | -0.8 (-0.3, 0.3) | -0.8 (-0.3, 0.3) |

**Note:** Data are presented as mean ± SD or median (interquartile range).

**Abbreviations:** POCD, postoperative cognitive dysfunction.
